# Supplementary material for: Impact of high resolution on Arctic Ocean simulations in Ocean Model Intercomparison Project phase 2 (OMIP-2)
Source: Copernicus journal article supplement (doi:10.5194/gmd-2023-123), 2023-06-26
Supplement: Supplementary file 1 [file gmd-2023-123-supplement.pdf]

# Supplementary Figures for “Impact of high resolution on Arctic Ocean simulations in Ocean Model Intercomparison Project phase 2 (OMIP-2)”

Qiang Wang<sup>1</sup>, Qi Shu<sup>2,3</sup>, Alexandra Bozec<sup>4</sup>, Eric Chassignet<sup>4</sup>, Pier Giuseppe Fogli<sup>5</sup>,  
Baylor Fox-Kemper<sup>6</sup>, Andy McC. Hogg<sup>7</sup>, Doroteaciro Iovino<sup>5</sup>, Andrew E. Kiss<sup>7</sup>, Nikolay Koldunov<sup>1</sup>,  
Julien Le Sommer<sup>8</sup>, Yiwen Li<sup>9</sup>, Pengfei Lin<sup>9</sup>, Hailong Liu<sup>9</sup>, Igor Polyakov<sup>10,11</sup>, Patrick Scholz<sup>1</sup>,  
Dmitry Sidorenko<sup>1</sup>, Shizhu Wang<sup>2,3</sup>, and Xiaobiao Xu<sup>4</sup>

<sup>1</sup>Alfred Wegener Institute Helmholtz Centre for Polar and Marine Research (AWI), Bremerhaven, Germany

<sup>2</sup>First Institute of Oceanography, Key Laboratory of Marine Science and Numerical Modeling, Ministry of Natural Resources, Qingdao, China

<sup>3</sup>Shandong Key Laboratory of Marine Science and Numerical Modeling, Qingdao, China

<sup>4</sup>Center for Ocean–Atmospheric Prediction Studies, Florida State University, Tallahassee, FL, USA

<sup>5</sup>Ocean Modeling and Data Assimilation Division, Fondazione Centro Euro-Mediterraneo sui Cambiamenti Climatici (CMCC), Bologna, Italy

<sup>6</sup>Department of Earth, Environmental, and Planetary Sciences, Brown University, Providence, RI, USA

<sup>7</sup>Research School of Earth Sciences and ARC Centre of Excellence for Climate Extremes, Australian National University, Canberra, Australia

<sup>8</sup>Univ. Grenoble Alpes, CNRS, IRD, Grenoble INP, INRAE, IGE, Grenoble, France

<sup>9</sup>State Key Laboratory of Numerical Modeling for Atmospheric Sciences and Geophysical Fluid Dynamics, Institute of Atmospheric Physics, Chinese Academy of Sciences, Beijing, China

<sup>10</sup>International Arctic Research Center and College of Natural Science and Mathematics, University of Alaska Fairbanks, Alaska, USA

<sup>11</sup>Finnish Meteorological Institute, Helsinki, Finland

**Correspondence:** Qiang Wang (Qiang.Wang@awi.de)

Content

Figures S1-S8

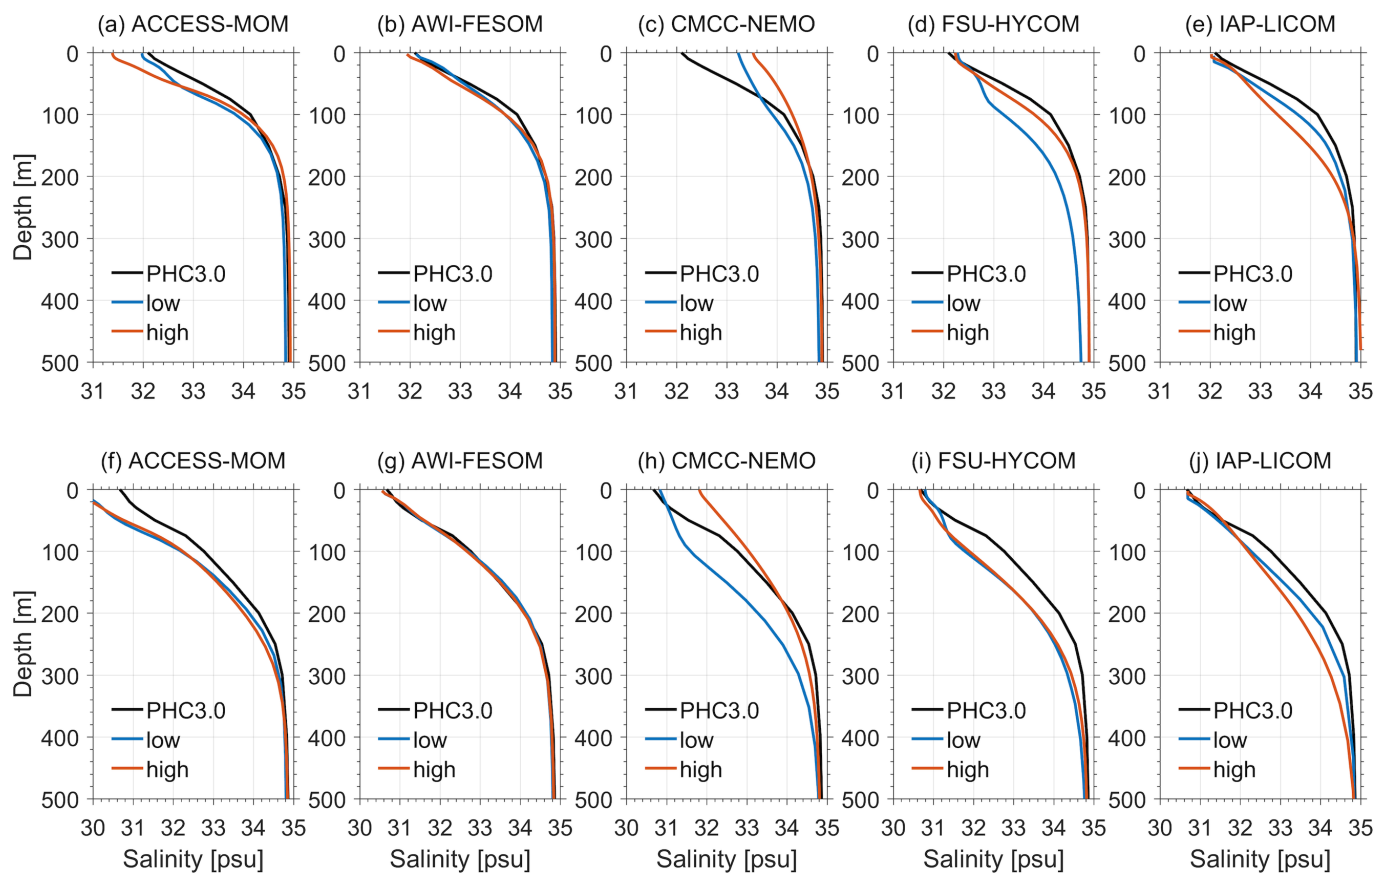

**Figure S1.** Profiles of basin-mean salinity for (a-e) the Eurasian Basin and (f-j) the Amerasian Basin averaged over 1971–2000. The PHC3.0 climatology (Steele et al., 2001) is shown with black lines.

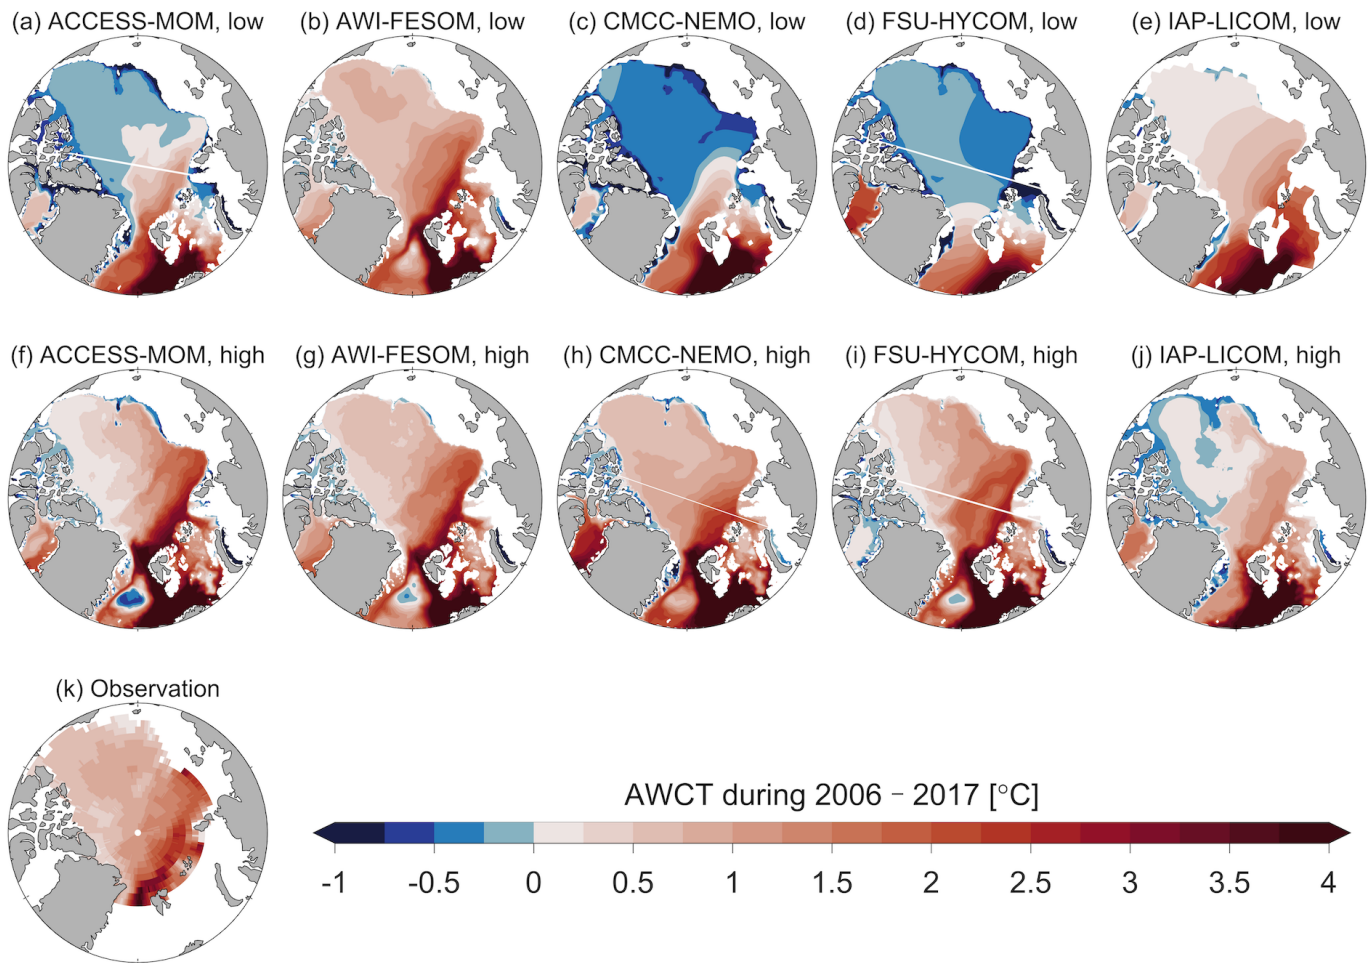

**Figure S2.** Simulated Atlantic Water core temperature (AWCT) averaged over 2006–2017 (a-j). (k) The AWCT for the same period based on observations (Polyakov et al., 2020).

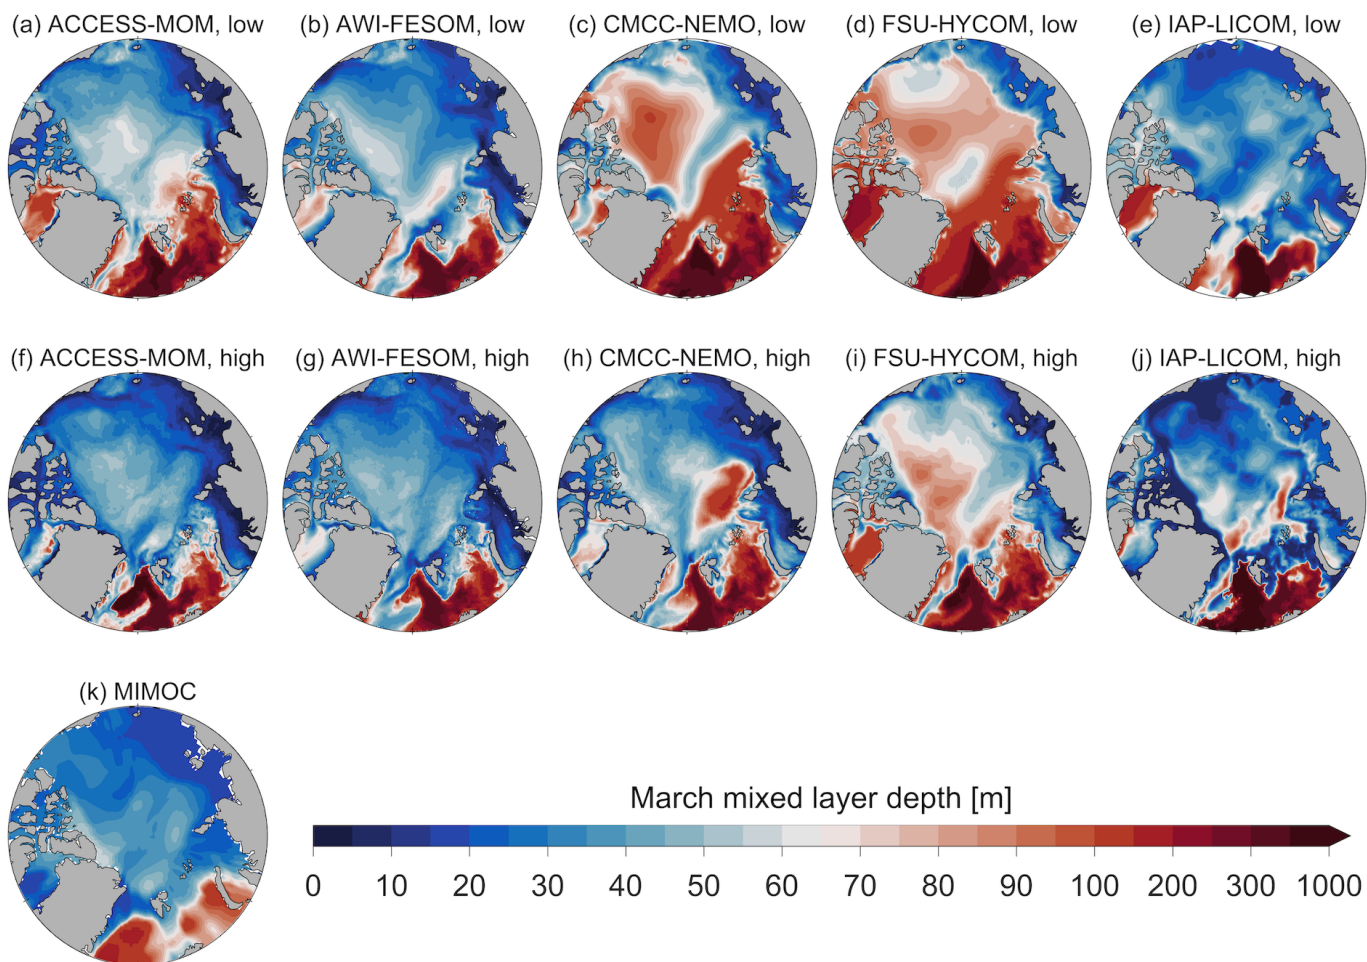

**Figure S3.** Mixed layer depth (MLD) in March averaged over 1971–2010. The MIMOC observational estimate (Schmidtke et al., 2013) is shown in (k). The density threshold for defining the MLD is  $0.03 \text{ kg/m}^3$  in this figure, different from Fig. 13 in the main text. This figure indicates that using a different MLD definition provides the same findings as described in the main text.

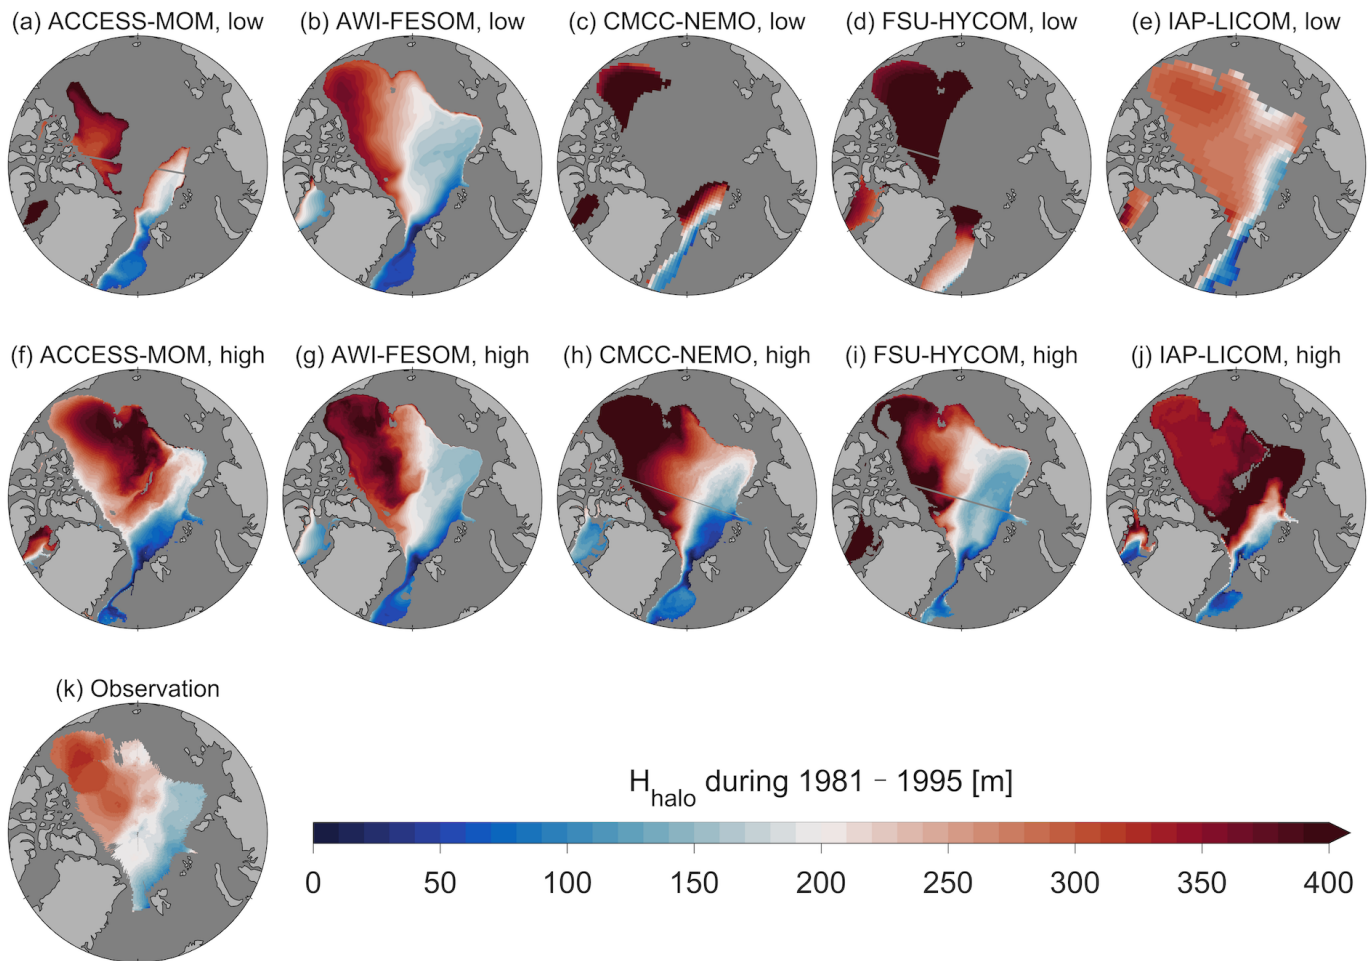

**Figure S4.** Cold halocline base depth averaged over 1981–1995 in low-resolution (a)-(e) and high-resolution (f)-(j) models. The observational estimate is shown in (k) (Polyakov et al., 2020).

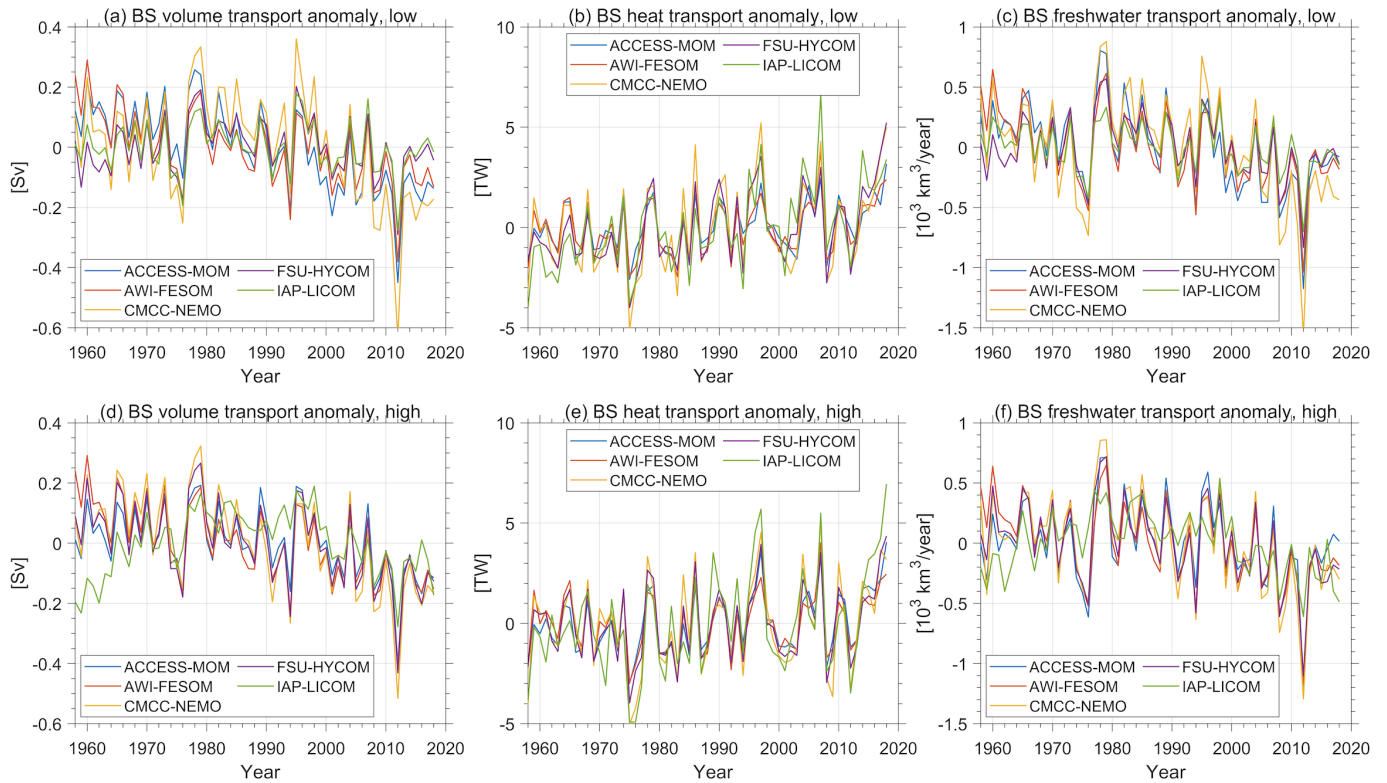

**Figure S5.** Anomalies of ocean (a) volume, (b) heat and (c) freshwater transports in the Bering Strait (BS) in low-resolution models. The anomalies are relative to the 1992–2008 mean. (d)(e)(f) The same as (a)(b)(c), but for high-resolution models. Heat transport is referenced to  $0^{\circ}\text{C}$ , and freshwater transport is referenced to 34.8 psu. This figure shows the anomalies in order to better illustrate the variability; the original time series are shown in Fig. 16 in the main text.

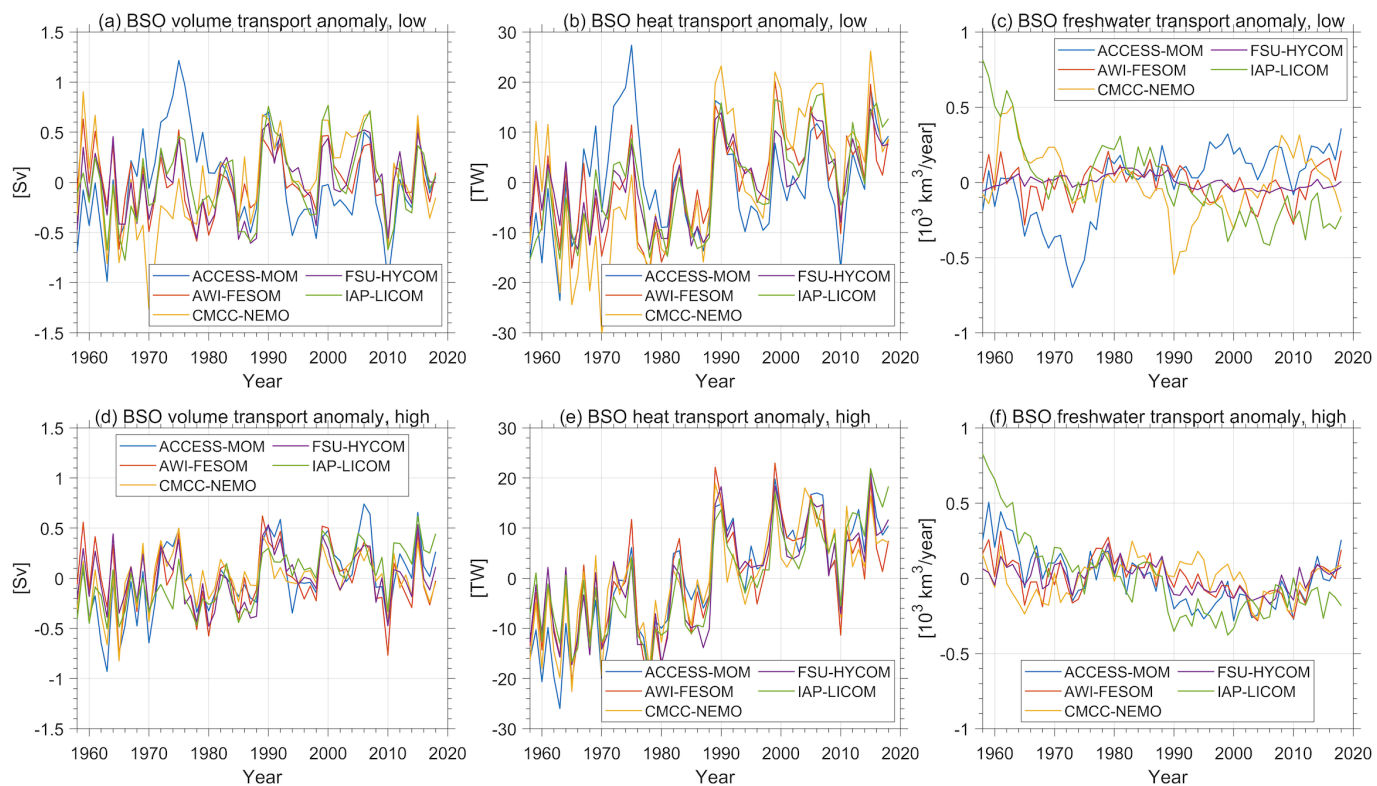

**Figure S6.** The same as Fig. S4, but for Barents Sea Opening (BSO). This figure shows the anomalies in order to better illustrate the variability; the original time series are shown in Fig. 17 in the main text.

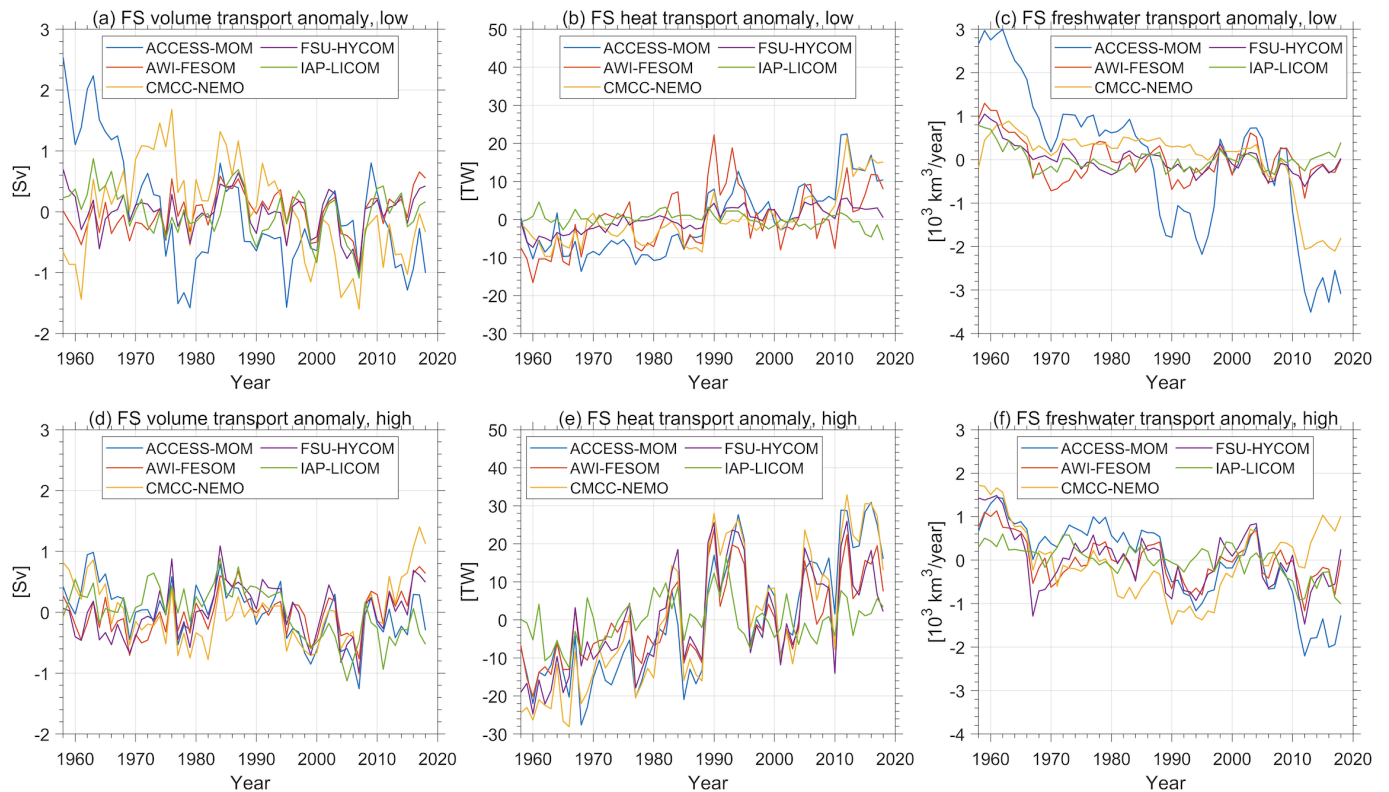

**Figure S7.** The same as Fig. S4, but for Fram Strait (FS). This figure shows the anomalies in order to better illustrate the variability; the original time series are shown in Fig. 18 in the main text.



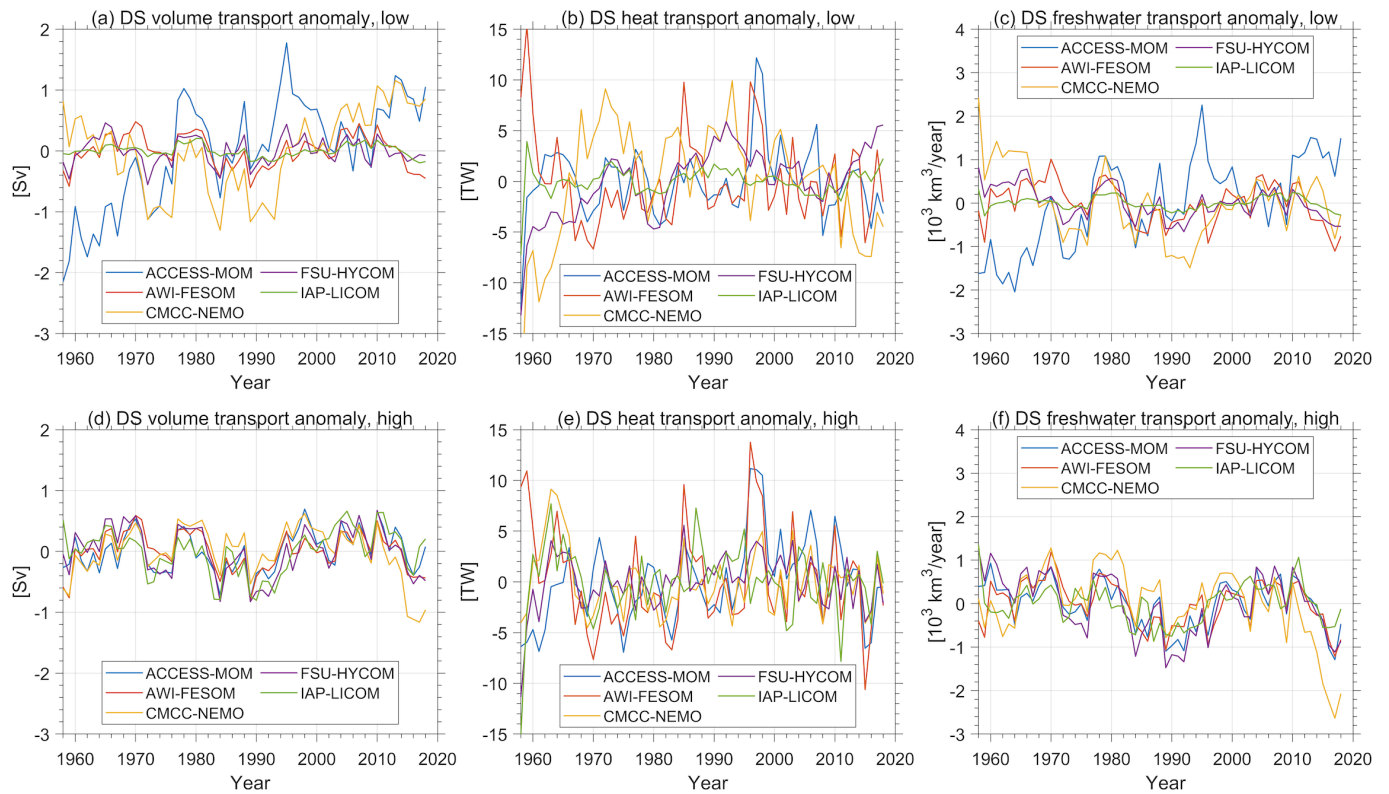

**Figure S8.** The same as Fig. S4, but for Davis Strait (DS). This figure shows the anomalies in order to better illustrate the variability; the original time series are shown in Fig. 19 in the main text.
